# Supplementary material
Source: PubMed Central journal article supplement (PMC4565745)
Supplement: NIHMS699340-supplement-Supplementary_Table.pdf [file NIHMS699340-supplement-Supplementary_Table.pdf]

| Supplemental table. Hospitalization characteristics among hospitalizations with and without a CHD diagnosis, Arkansas State Inpatient Databases 2006-2011 <sup>a</sup> |              |                             |                                |                  |                             |                                |
|------------------------------------------------------------------------------------------------------------------------------------------------------------------------|--------------|-----------------------------|--------------------------------|------------------|-----------------------------|--------------------------------|
|                                                                                                                                                                        | CHD          |                             |                                | No CHD           |                             |                                |
| Hospitalization factor                                                                                                                                                 | N (%)        | Mean Cost (SE) <sup>b</sup> | Median Cost (IQR) <sup>b</sup> | N (%)            | Mean Cost (SE) <sup>b</sup> | Median Cost (IQR) <sup>b</sup> |
| Admission type                                                                                                                                                         |              |                             |                                |                  |                             |                                |
| Emergency/Urgent                                                                                                                                                       | 5,349 (59.0) | 54,957 (1,670)              | 16,459 (5,740-51,539)          | 1,344,485 (60.2) | 8,416 (13)                  | 4,885 (2,928-8,807)            |
| Elective                                                                                                                                                               | 1,899 (20.9) | 18,948 (538)                | 11,252 (4,930-25,466)          | 816,011 (36.5)   | 8,763 (13)                  | 5,679 (3,146-10,495)           |
| Newborn/Delivery                                                                                                                                                       | 1,818 (20.0) | 13,991 (653)                | 2,667 (1,256-13,494)           | 69,500 (3.1)     | 4,612 (49)                  | 1,124 (735-2,597)              |
| Missing                                                                                                                                                                | 5 (0.1)      |                             |                                | 3,417 (0.2)      |                             |                                |
| Admitted with injury                                                                                                                                                   |              |                             |                                |                  |                             |                                |
| No Injury                                                                                                                                                              | 1,650 (18.2) | 50,420 (3,851)              | 12,348 (3,939-38,023)          | 332,851 (14.9)   | 8,058 (25)                  | 4,828 (2,771-8,985)            |
| Injury as principal diagnosis                                                                                                                                          | 21 (0.2)     | 19,291 (5,308)              | 9,019 (5,129-19,244)           | 16,618 (0.7%)    | 10,313 (171)                | 6,615 (3,497-10,744)           |
| Injury as secondary diagnosis                                                                                                                                          | 25 (0.3)     | 47,492 (18,874)             | 15,186 (6,298-39,257)          | 13,231 (0.6)     | 10,304 (138)                | 6,309 (3,428-11,544)           |
| Missing                                                                                                                                                                | 7,375 (81.3) |                             |                                | 1,870,713 (83.8) |                             |                                |
| Invasive surgical procedure                                                                                                                                            |              |                             |                                |                  |                             |                                |
| No invasive surgery                                                                                                                                                    | 1,035 (11.4) | 16,913 (979)                | 5,979 (2,734-15,402)           | 263,615 (11.8)   | 6,319 (20)                  | 4,041 (2,424-6,991)            |
| Invasive surgery                                                                                                                                                       | 661 (7.3)    | 101,793 (9,169)             | 35,449 (15,795-65,668)         | 99,085 (4.4)     | 13,363 (69)                 | 8,948 (5,190-14,625)           |
| Missing                                                                                                                                                                | 7,375 (81.3) |                             |                                | 1,870,713 (83.8) |                             |                                |
| Length of stay                                                                                                                                                         |              |                             |                                |                  |                             |                                |
| 0 days                                                                                                                                                                 | 389 (4.3%)   | 2,359 (178)                 | 1,307 (784-2,864)              | 40,977 (1.8)     | 2,828 (18)                  | 1,934 (1,082-3,384)            |
| 1-3 days                                                                                                                                                               | 3,210 (35.4) | 5,985 (120)                 | 3,617 (1,788-7,510)            | 1,210,937 (54.2) | 4,855 (4)                   | 3,536 (2,207-5,768)            |
| 4-7 days                                                                                                                                                               | 2,263 (24.9) | 18,508 (329)                | 12,185 (6,026-28,222)          | 592,853 (26.5)   | 8,060 (8)                   | 6,344 (4,167-9,690)            |
| 8 or more days                                                                                                                                                         | 3,204 (35.3) | 89,118 (2,354)              | 46,279 (21,704-96,804)         | 388,415 (17.4)   | 20,605 (46)                 | 13,157 (8,169-22,815)          |
| Missing                                                                                                                                                                | 5 (0.1)      |                             |                                | 231 (0.0)        |                             |                                |
| <sup>a</sup> Excludes hospitalizations missing age, hospital charges, hospitalizations of out of state residents, and normal newborn births                            |              |                             |                                |                  |                             |                                |
| <sup>b</sup> Costs have been adjusted to 2012 U.S. dollars using the Purchaser Price Index for Hospitals                                                               |              |                             |                                |                  |                             |                                |
